# Supplementary material for: Skipping Breakfast for 6 Days Delayed the Circadian Rhythm of the Body Temperature without Altering Clock Gene Expression in Human Leukocytes
Source: PubMed Central journal article supplement (PMC7551061; doi:10.3390/nu12092797), 2020-09-12
Supplement: nutrients-12-02797-s001.pdf [file nutrients-12-02797-s001.pdf]

**Supplementary Table 1.** Primer sequences for quantitative real-time PCR.

| <b>Gene</b>  | <b>Accession No.</b> | <b>Forward primer (5' --&gt;3')</b> | <b>Reverse Primer (5' --&gt;3')</b> |
|--------------|----------------------|-------------------------------------|-------------------------------------|
| <i>CLOCK</i> | NM_004898.3          | ACTCCACCCAGGCAGCATTTA               | TGGGACATGCCTTGTGGAA                 |
| <i>BMAL1</i> | NM_001030272.1       | CGGAGTCGATGGTTCAGTTTCA              | AGCATGCTGTCCATGCTGTG                |
| <i>PER1</i>  | NM_002616.3          | ACAAGCAAATACTTTGGCAGCATC            | CCTGCTTCAGCACAGAGGTCA               |
| <i>PER2</i>  | NM_022817.3          | GTGCCAAGCAGTTGACTTAATAGGA           | CCTGTGTAAGCACACACACTAAAGA           |
| <i>PER3</i>  | NM_016831.2          | GCGCACTCATATATGCTAAGCCTTC           | CTGCGACAAGCACCAAGTTTCA              |
| <i>CRY1</i>  | NM_004075.4          | CCTCCAATGTGGGCATCA                  | GAATCACAAACAGACGGGAGTTTA            |
| <i>CRY2</i>  | NM_021117.3          | CATCATGAAGATGGCCAAGGA               | GGCCTGAAAGCGCTTGTATGTAA             |
| <i>NR1D1</i> | NM_021724.5          | GTGAAGACATGACGACCCTGGA              | GGAGCCACTGGAGCCAATGTA               |
| <i>NR1D2</i> | NM_005126.4          | AGATGTCAGCAATGTCGCTTCA              | GCTTAGGAATACGACCAAACCGAAC           |
| <i>DBP</i>   | NM_001352.4          | GCACACCTCTCGGTGCAGAT                | GATCAAGCGGTCTGGCTCTTT               |
| <i>TBP</i>   | NM_003194.5          | TGCTGCGGTAATCATGAGGATA              | TGAAGTCCAAGAAGCTTAGCTGGAA           |

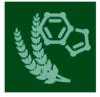

(°C) Three-meal condition: subject C

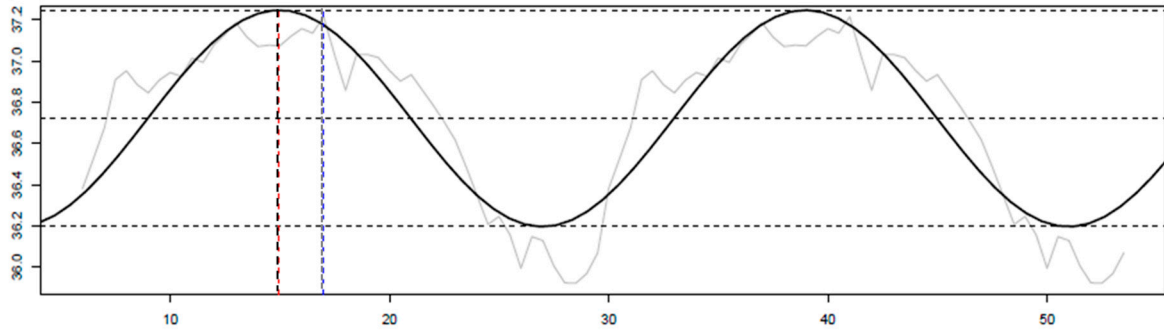

(°C) Breakfast skipping condition: subject C

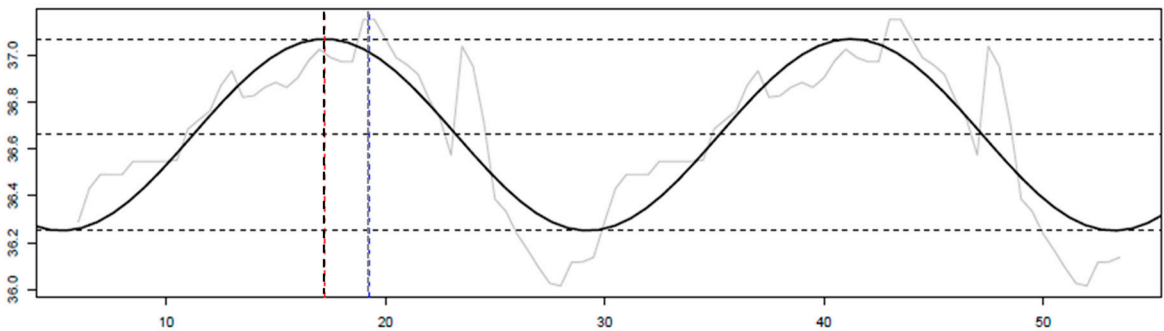

(°C) Three-meal condition: subject I

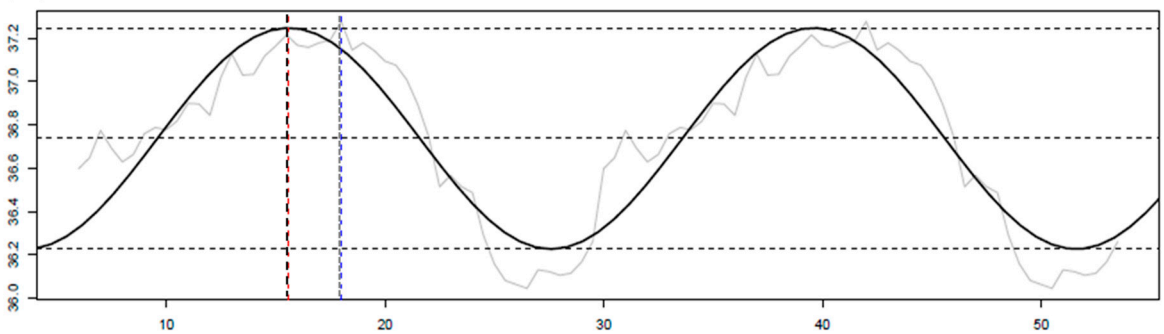

(°C) Breakfast skipping condition: subject I

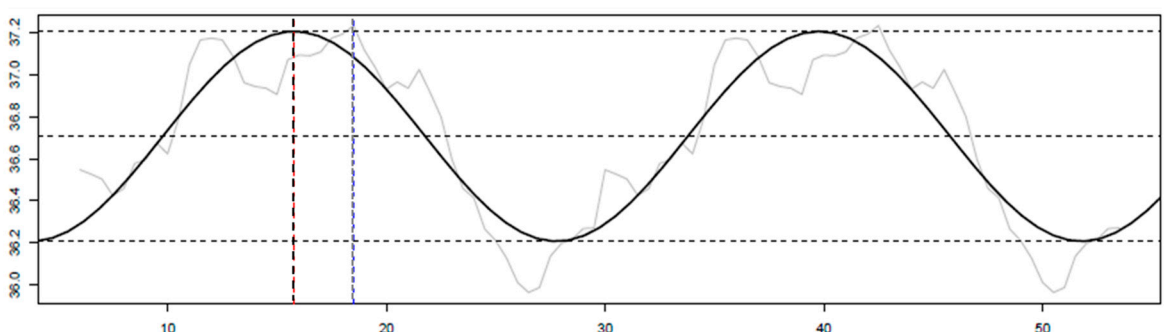

Time of the day

**Supplemental Figure 1.** Typical example of core body temperature and the results of the cosinor analysis. Double plots of the value for core body temperature (thin line) and the results of cosinor fitting (solid line) in the 2 dietary conditions. Peak time is plotted by the broken line.

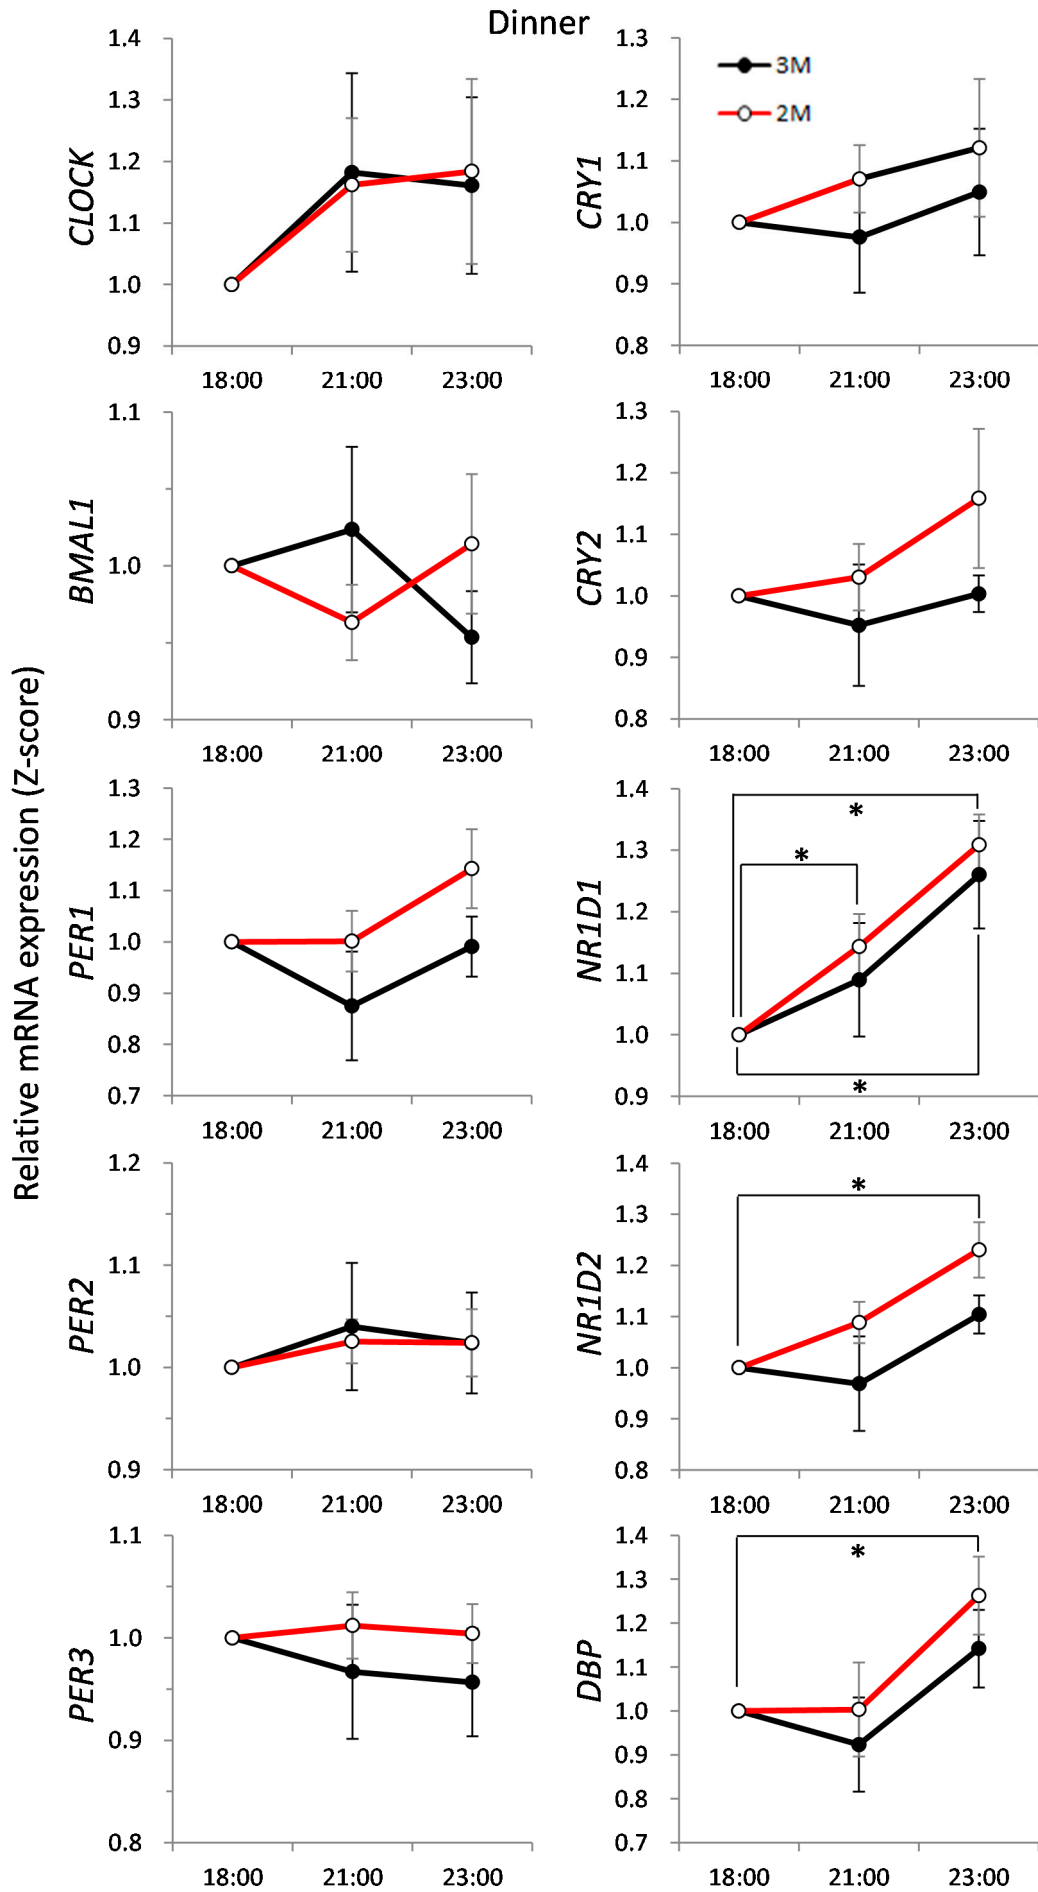

**Supplemental Figure 2.** Gene expression after dinner. The gene clock expression profiles are presented as the mean value  $\pm$  SEM for the 2 dietary conditions. Blood samples were collected 5.5 h after lunch (time point 18:00), 3 h after dinner (21:00), and 5 h after dinner (23:00). The closed circle indicates the 3M condition (●) and the open circle indicates the 2M condition (○). One-way ANOVA was used to evaluate the effect of a meal on expression of the clock gene. As a post-hoc test, multiple comparisons using Dunnett's test were conducted.
